# Supplementary material for: Partitioning of Metal Contaminants between Bulk and Fine-Grained Fraction in Freshwater Sediments: A Critical Appraisal
Source: MDPI journal article supplement (doi:10.3390/min11060603), 2021-06-03
Supplement: s1 [file s1]

Table S1. Location of sampling and particle size distribution parameters.

| Sample No. |     | coordinates               | Sample             | % sand | % silt | % clay | Mz* (µm) |
|------------|-----|---------------------------|--------------------|--------|--------|--------|----------|
| 1          | S1  | 45°02'25.8"N 18°41'45.3"E | Sava-Županja       | 26.3   | 64.2   | 9.5    | 59.2     |
| 2          | S2  | 45°03'36.6"N 18°30'16.9"E | Sava-Šamac         | 35.4   | 56.7   | 7.9    | 105.1    |
| 3          | S3  | 45°08'23.1"N 18°04'26.2"E | Sava-Sl Brod       | 25.8   | 64.5   | 9.7    | 50.2     |
| 4          | S4  | 45°24'04.3"N 16°32'22.9"E | Sava-Lukavec       | 76.9   | 20.3   | 2.8    | 214.4    |
| 5          | S5  | 45°51'44.3"N 15°41'16.6"E | Sava-Drenje        | 85.1   | 13.2   | 1.7    | 334.5    |
| 6          | S6  | 45°44'37.5"N 16°13'41.5"E | Sava-Rugvica       | 23.9   | 64.3   | 11.8   | 59.3     |
| 7          | Bo  | 45°04'08.7"N 19°04'17.7"E | Bosut              | 18.9   | 69.1   | 12.0   | 52.5     |
| 8          | Or  | 45°17'11.0"N 17°48'19.0"E | Orljava            | 54.6   | 41.8   | 3.6    | 171.9    |
| 9          | U1  | 45°15'41.7"N 16°54'46.3"E | Una-Jasenovac      | 43.3   | 50.6   | 6.0    | 104.4    |
| 10         | U2  | 45°13'19.5"N 16°32'59.1"E | Una-Kostajnica     | 86.2   | 11.8   | 2.0    | 407.4    |
| 11         | Il  | 45°28'08.5"N 16°54'30.4"E | Ilova              | 29.7   | 62.8   | 7.5    | 85.2     |
| 12         | Cs  | 45°37'35.5"N 16°33'29.7"E | Česma              | 78.9   | 18.9   | 2.2    | 290.7    |
| 13         | K1  | 45°26'50.9"N 16°04'39.8"E | Kupa-Šišinec       | 29.6   | 62.4   | 8.0    | 57.4     |
| 14         | K2  | 45°38'43.9"N 15°21'24.0"E | Kupa-Bubnjarci     | 71.0   | 26.5   | 2.5    | 221.8    |
| 15         | K3  | 45°28'40.7"N 16°14'26.9"E | Kupa-M Gorica      | 39.5   | 53.9   | 6.6    | 113.1    |
| 16         | Gl  | 45°20'10.4"N 16°04'59.1"E | Glina              | 39.7   | 54.8   | 5.5    | 81.4     |
| 17         | Ko  | 45°23'31.3"N 15°35'45.7"E | Korana             | 41.8   | 50     | 8.2    | 106.3    |
| 18         | Mr  | 45°27'57.3"N 15°33'35.4"E | Mrežnica           | 62.6   | 33.8   | 3.6    | 270.2    |
| 19         | Do  | 45°33'25.1"N 15°31'04.7"E | Dobra              | 45.5   | 49.4   | 5.1    | 129.6    |
| 20         | Kr  | 45°55'59.0"N 15°49'01.3"E | Krapina            | 67.0   | 30.4   | 2.6    | 401.1    |
| 21         | Su  | 45°53'30.6"N 15°41'03.3"E | Sutla              | 41.8   | 51.4   | 6.7    | 126.2    |
| 22         | Be  | 46°17'27.3"N 16°44'18.0"E | Bednja             | 83.5   | 14.7   | 1.8    | 349.9    |
| 23         | Dr1 | 45°41'28.9"N 18°25'08.0"E | Drava-Belišće      | 68.0   | 28.7   | 3.3    | 168.0    |
| 24         | Dr2 | 45°33'06.0"N 18°51'30.9"E | Drava-Dunav        | 90.1   | 8.7    | 1.2    | 254.8    |
| 25         | Dr3 | 45°46'55.9"N 18°12'06.4"E | Drava-D Miholjac   | 44.4   | 50.8   | 4.8    | 79.7     |
| 26         | Dr4 | 45°56'39.6"N 17°27'46.0"E | Drava-T Polje      | 64.6   | 32.3   | 3.1    | 150.4    |
| 27         | Dr5 | 46°14'28.5"N 16°56'15.8"E | Drava-Botovo       | 58.2   | 38.4   | 3.3    | 127.5    |
| 28         | Dr6 | 46°17'52.6"N 16°52'50.3"E | Drava-Legrad       | 85.4   | 12.2   | 2.3    | 262.0    |
| 29         | Dr7 | 45°35'56.8"N 18°35'41.4"E | Drava-Josipovac    | 52.2   | 43.8   | 4.0    | 118.3    |
| 30         | Du1 | 45°51'00.8"N 18°51'16.6"E | Dunav-Batina       | 38.0   | 55.4   | 6.6    | 105.8    |
| 31         | Du2 | 45°13'49.8"N 19°22'45.7"E | Dunav-Ilok         | 31.1   | 62     | 6.8    | 65.3     |
| 32         | Mu  | 46°25'11.5"N 16°41'35.0"E | Mura               | 62.6   | 33.9   | 3.5    | 136.2    |
| 33         | Mi  | 45°21'28.0"N 13°44'13.8"E | Mirna              | 8.5    | 70.3   | 21.2   | 24.2     |
| 34         | Ra  | 45°11'14.1"N 14°04'41.2"E | Raša               | 10.6   | 66.6   | 22.8   | 25.2     |
| 35         | Ct  | 43°26'14.1"N 16°45'28.0"E | Cetina             | 56.8   | 38.9   | 4.2    | 248.9    |
| 36         | Ne  | 43°03'14.7"N 17°39'06.7"E | Neretva            | 83.3   | 14.6   | 2.1    | 221.8    |
| 37         | Zr  | 44°11'43.1"N 15°46'14.4"E | Zrmanja            | 27.3   | 64.7   | 8.0    | 61.5     |
| 38         | KM  | 43°57'46.7"N 15°59'31.2"E | Krka-Manastir      | 45.6   | 49.3   | 5.1    | 104.1    |
| 39         | Od  | 45°40'25.6"N 16°10'38.3"E | Odra               | 56.2   | 41.8   | 2.0    | 172.2    |
| 40         | BJ  | 43°04'40.1"N 17°24'50.5"E | Bačinska Lakes     | 45.3   | 48.5   | 6.2    | 113.1    |
| 41         | AP  | 45°25'39.7"N 16°54'10.2"E | Reservoir-Pakra    | 22.0   | 67.7   | 10.3   | 64.8     |
| 42         | JP  | 44°51'42.0"N 15°36'01.6"E | Lake Prošće        | 12.4   | 76.4   | 11.2   | 31.0     |
| 43         | JK  | 44°51'44.0"N 15°36'01.8"E | Lake Kozjak        | 13.7   | 72.3   | 14.0   | 40.2     |
| 44         | VC  | 44°51'17.0"N 14°23'38.0"E | Lake Vransko-Cres  | 30.9   | 64.4   | 4.7    | 68.9     |
| 45         | VP  | 43°55'42.3"N 15°30'42.9"E | Lake Vransko-Biog  | 37.3   | 59.2   | 3.5    | 85.9     |
| 46         | KV  | 43°51'37.6"N 15°58'30.3"E | Krka- Lake Visovac | 7.6    | 83.3   | 9.1    | 16.9     |
| 47         | AB  | 45°23'29.7"N 18°11'15.1"E | Reservoir-Borovik  | 20.8   | 68.3   | 10.9   | 64.8     |

\*Mz= average particle size
